# Supplementary material for: NIR fluorescent DCPO glucose analogues and their application in cancer cell imaging
Source: Royal Society of Chemistry journal article supplement (doi:10.1039/c6ra18613k), 2016-01-01

## Supporting material

### NIR Fluorescent DCPO Glucose Analogues and Their Application in Cancer Cell Imaging

Shiguang Chen,<sup>\*a</sup> Yanfen Fang,<sup>\*a</sup> Qiwen Zhu,<sup>a</sup> Wanli Zhang,<sup>a</sup> Xiongwen Zhang,<sup>\*a</sup> and Wei Lu<sup>\*a,b</sup>

<sup>a</sup> School of Chemistry and Molecular Engineering, East China Normal University, 3663 North Zhongshan Road, Shanghai 200062, P. R. China.

<sup>b</sup> State Key Laboratory of Fine Chemicals, Dalian University of Technology, Dalian 116024, P. R. China.

#### CONTENTS:

|                                                                                      |    |
|--------------------------------------------------------------------------------------|----|
| Copies of <sup>1</sup> H NMR of compound <b>2</b>                                    | S2 |
| Copies of <sup>1</sup> H NMR and <sup>13</sup> C NMR of <b>N<sub>3</sub>-DCPO(7)</b> | S2 |
| Copies of <sup>1</sup> H NMR and <sup>13</sup> C NMR of <b>N0</b>                    | S3 |
| Copies of <sup>1</sup> H NMR and <sup>13</sup> C NMR of <b>N1</b>                    | S4 |
| Copies of <sup>1</sup> H NMR and <sup>13</sup> C NMR of <b>N2</b>                    | S5 |
| Copies of <sup>1</sup> H NMR and <sup>13</sup> C NMR of <b>N3</b>                    | S6 |
| Copies of <sup>1</sup> H NMR and <sup>13</sup> C NMR of <b>N4</b>                    | S7 |









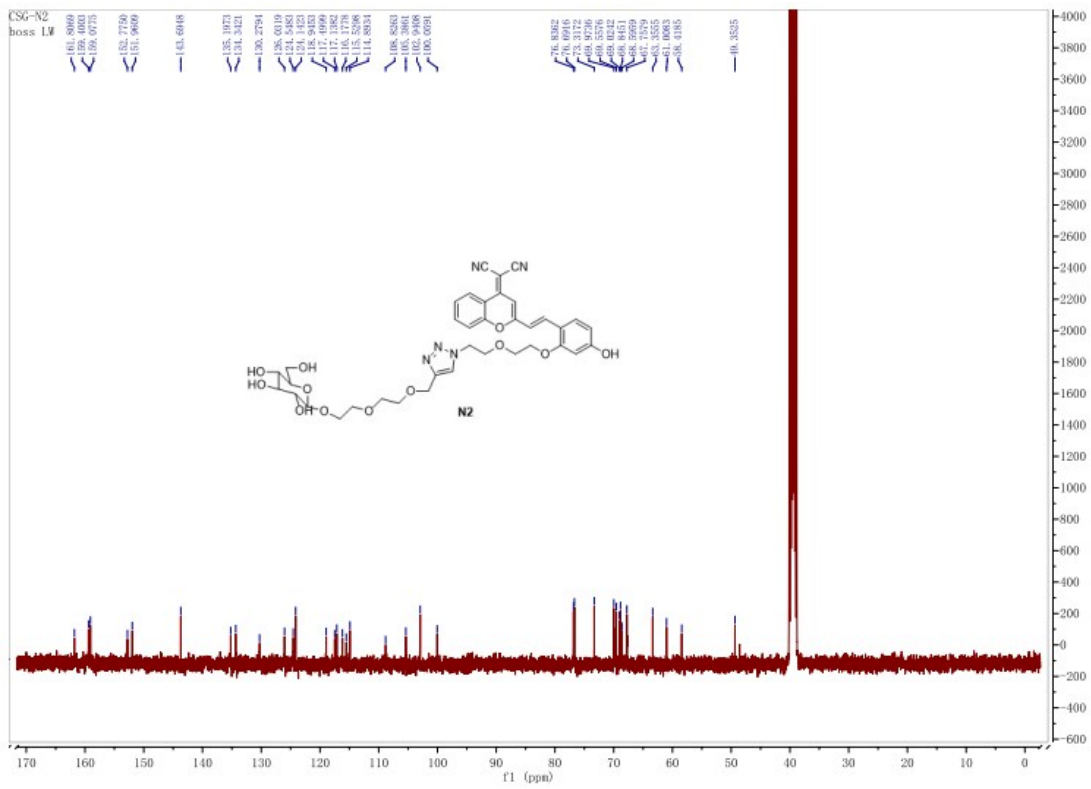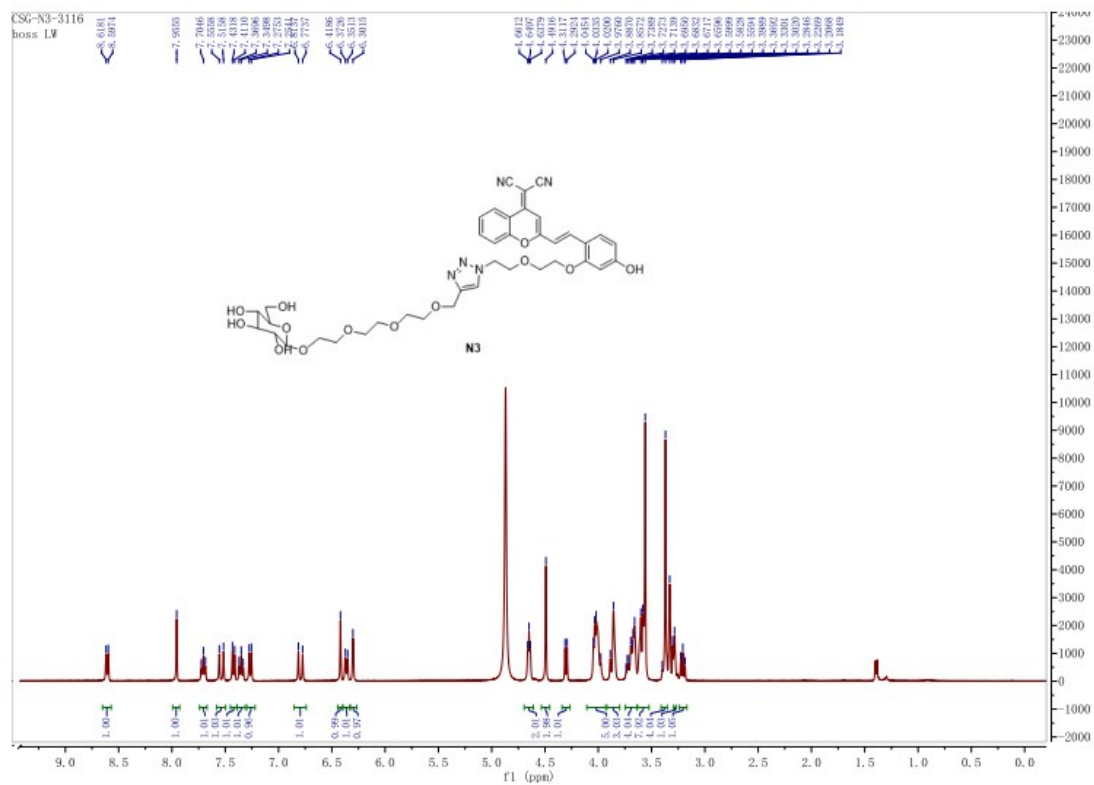

Supplement: c6ra18613k1.pdf [file c6ra18613k1.pdf]
